# Supplementary material for: Complete Skin Clearance is Associated with the Greatest Benefits to Health-Related Quality of Life and Perceived Symptoms for Patients with Psoriasis
Source: PubMed Central journal article supplement — Dermatol Ther (Heidelb). 2024 Sep 17;14(10):2841–57. doi: 10.1007/s13555-024-01261-6 (PMC11480266; doi:10.1007/s13555-024-01261-6), 2024-09-17
Supplement: 13555_2024_1261_MOESM1_ESM.pdf [file 13555_2024_1261_MOESM1_ESM.pdf]

1 **Complete Skin Clearance is Associated with the Greatest**  
2 **Benefits to Health-Related Quality of Life and Perceived**  
3 **Symptoms for Patients with Psoriasis**

4

5 **Supplementary Material**

6

7 Matthias Augustin,<sup>1</sup> Alice B. Gottlieb,<sup>2</sup> Mark Lebwohl,<sup>2</sup> Andreas Pinter,<sup>3</sup>

8 Richard B. Warren,<sup>4,5</sup> Luis Puig,<sup>6</sup> Rhys Warham,<sup>7,8</sup> Jérémy Lambert,<sup>9</sup>

9 Susanne Wiegratz,<sup>10</sup> Balint Szilagyi,<sup>10</sup> Andrew Blauvelt<sup>11</sup>

10

11 <sup>1</sup>Institute for Health Services Research in Dermatology and Nursing (IVDP),  
12 University Medical Center Hamburg-Eppendorf (UKE), Hamburg, Germany;

13 <sup>2</sup>Department of Dermatology, The Icahn School of Medicine at Mount Sinai, New  
14 York, New York, USA; <sup>3</sup>University Hospital Frankfurt, Frankfurt am Main, Germany;

15 <sup>4</sup>Dermatology Centre, Northern Care Alliance NHS Foundation Trust, Manchester, UK;

16 <sup>5</sup>NIHR Manchester Biomedical Research Centre, Manchester University NHS  
17 Foundation Trust, Manchester Academic Health Science Centre, Manchester, UK;

18 <sup>6</sup>Hospital de la Santa Creu i Sant Pau, Universitat Autònoma de Barcelona, Barcelona,  
19 Spain; <sup>7</sup>Veramed, London, UK; <sup>8</sup>UCB, Slough, UK; <sup>9</sup>UCB, Colombes,

20 France; <sup>10</sup>UCB, Monheim am Rhein, Germany; <sup>11</sup>Oregon Medical Research  
21 Center, Portland, Oregon, USA

22

23 Correspondence to: Matthias Augustin; [m.augustin@uke.de](mailto:m.augustin@uke.de)

24 Institute for Health Services Research in Dermatology and Nursing (IVDP), University  
25 Medical Center Hamburg-Eppendorf (UKE), Hamburg, Germany

26

1 **Figure S1. Model-estimated proportions of patients achieving scores of 0 in**  
 2 **each DLQI item at different PASI improvement levels**  
 3 **A) Over 16 weeks**

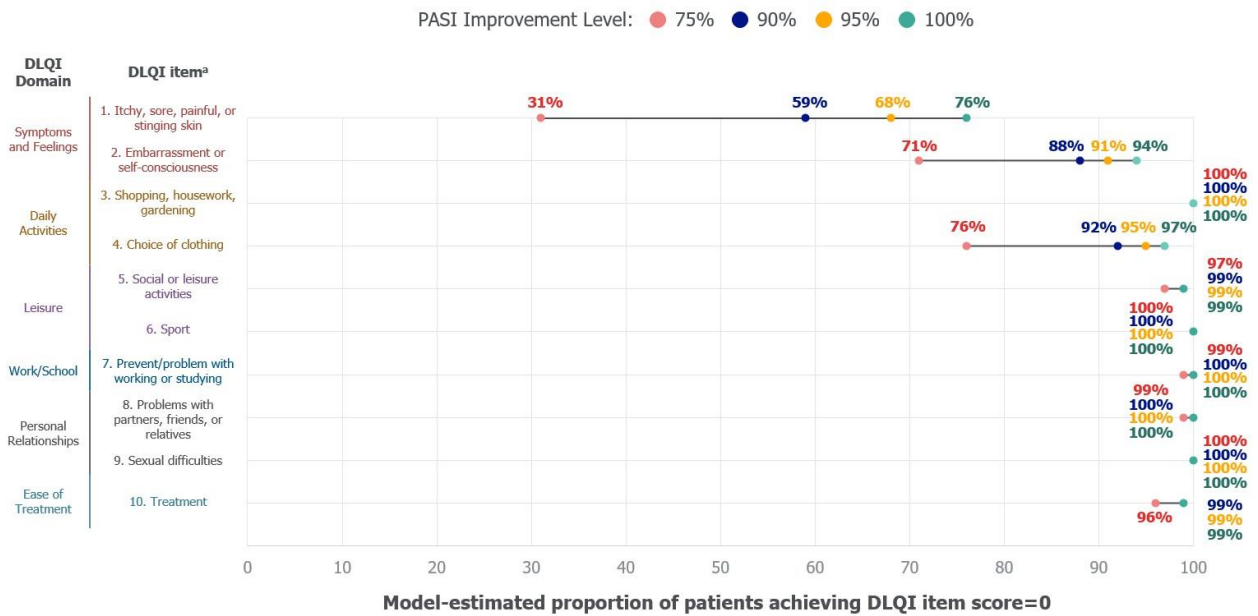

4 **B) Over 2 years**

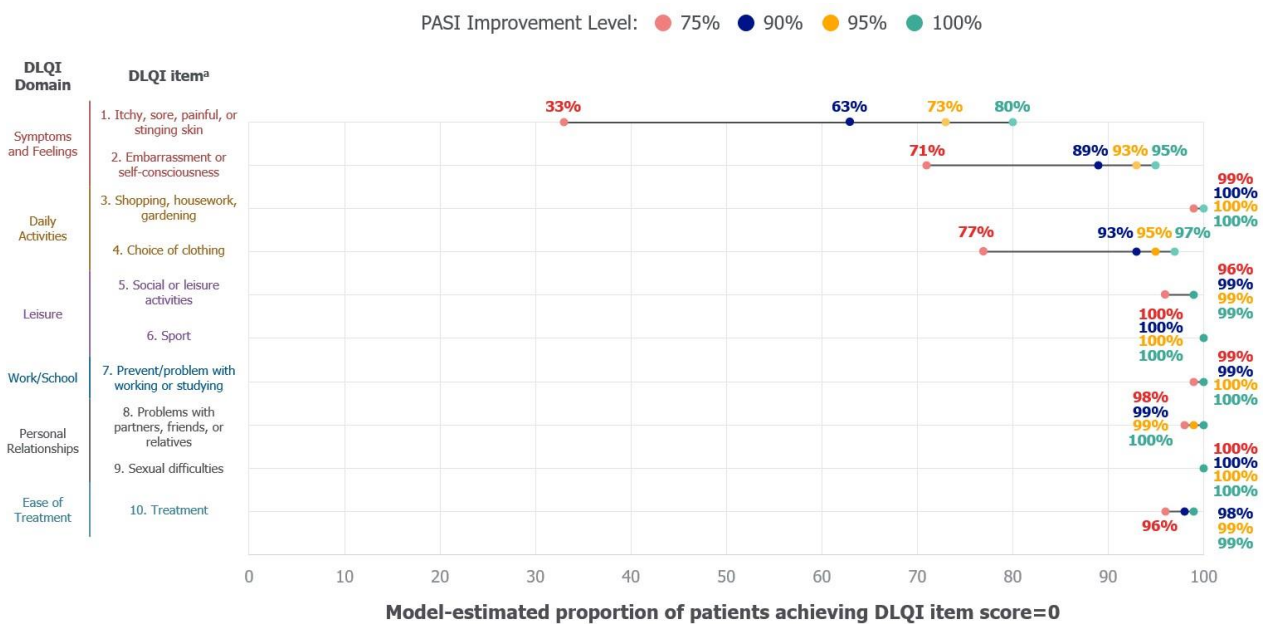

5 A mixed-effects logistic regression model used data pooled across all trial visits and  
 6 treatments over a) 16 weeks and b) 2 years of BE RADIANT to estimate the proportions of  
 7 patients achieving DLQI item score=0 at specific PASI improvement levels. [a] For DLQI  
 8 Items 3–10, an item score of 0 ('not relevant') may mean that the activity in question is not  
 9 possible, sometimes due to severe disease, rather than there being no impact of disease on  
 10 the activity. Model estimates were calculated with baseline DLQI item scores equal to the  
 11 baseline median for the respective populations (16 weeks: all randomised patients; 2 years:  
 12 patients who entered the OLE). DLQI: Dermatology Life Quality Index; PASI: Psoriasis Area  
 13 and Severity Index.

1 **Table S1. Data collection schedule**

2

|                | <b>Week of BE RADIANT</b> |          |          |          |          |           |           |           |           |           |           |           |           |           |                       |           |           |           |           |           |           |
|----------------|---------------------------|----------|----------|----------|----------|-----------|-----------|-----------|-----------|-----------|-----------|-----------|-----------|-----------|-----------------------|-----------|-----------|-----------|-----------|-----------|-----------|
| <b>Outcome</b> | <b>0</b>                  | <b>1</b> | <b>2</b> | <b>4</b> | <b>8</b> | <b>12</b> | <b>16</b> | <b>20</b> | <b>24</b> | <b>28</b> | <b>32</b> | <b>36</b> | <b>40</b> | <b>44</b> | <b>48<sup>a</sup></b> | <b>52</b> | <b>56</b> | <b>64</b> | <b>72</b> | <b>84</b> | <b>96</b> |
| PASI           | X                         | X        | X        | X        | X        | X         | X         | X         | X         | X         | X         | X         | X         | X         | X                     | X         | X         | X         | X         | X         | X         |
| DLQI           | X                         |          |          | X        | X        | X         | X         |           |           |           | X         |           |           |           | X                     |           |           |           | X         |           | X         |
| P-SIM          | X                         |          |          | X        | X        | X         | X         |           |           |           | X         |           |           |           | X                     |           | X         | X         | X         | X         | X         |

3 [a] The OLE began at Week 48. DLQI: Dermatology Life Quality Index; OLE: open-label extension; PASI: Psoriasis Area and Severity Index; P-SIM: Psoriasis  
 4 Symptoms and Impacts Measure.

5
